# Supplementary material for: Bacillus circulans GN03 Alters the Microbiota, Promotes Cotton Seedling Growth and Disease Resistance, and Increases the Expression of Phytohormone Synthesis and Disease Resistance-Related Genes
Source: PubMed Central journal article supplement (PMC8079787; doi:10.3389/fpls.2021.644597), 2021-04-14
Supplement: Data_Sheet_1.pdf [file Data_Sheet_1.pdf]

---

***Bacillus circulans* GN03 alters the microbiota to promote cotton seedling growth and disease resistance via the expression of phytohormone synthesis and disease resistance-related genes**

Lijun Qin<sup>1,2,#</sup>, Peidong Tian<sup>1,#</sup>, Qunyao Cui<sup>1</sup>, Shuping Hu<sup>1</sup>, Chengjian Xie<sup>1</sup>, Wei Jian<sup>1</sup>, Xingyong Yang<sup>1\*</sup>, Hong Shen<sup>2,3\*</sup>

1. College of Life Science, Chongqing Normal University, 401331, China
2. Biological Science Research Center of Southwest University, 400715, China
3. College of Resources and Environment, Southwest University, 400715, China

Running Head: Plant growth and *Bacillus circulans* GN03

<sup>#</sup>These authors contributed equally to this work.

\*Address correspondence to Xingyong Yang (yangxy94@swu.edu.cn) and Hong Shen (shenhong@swu.edu.cn).

## Supplementary Material

### Supplementary Figures

**Figure S1:** Rarefaction curves of microbiota. (a) the bacterial at rhizosphere, (b) in cotton roots. Plot with Shannon index at OTU level of 97% similarity

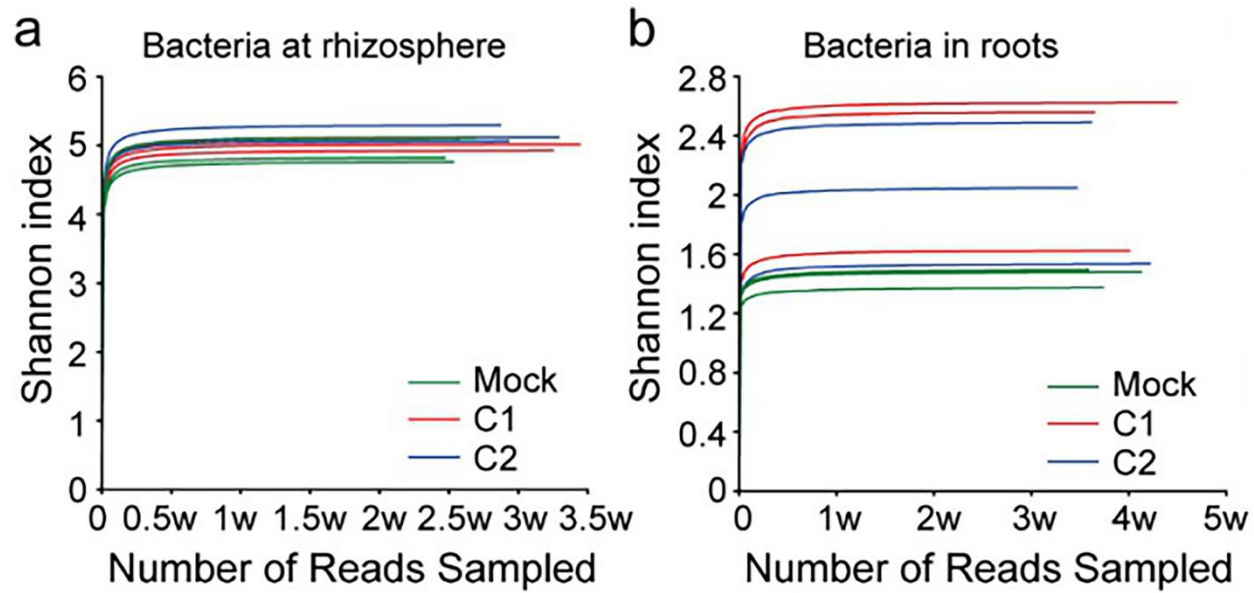

---

**Figure S2:** Morphological characteristics of *B. circulans* GN03. **(a)** Gram stain of GN03. Blue-purple is positive and red is negative. **(b)** Spore stain of GN03. The spores are green and the cells are red. Cultivated for 16 h at 37 °C. bar = 10  $\mu\text{m}$ .

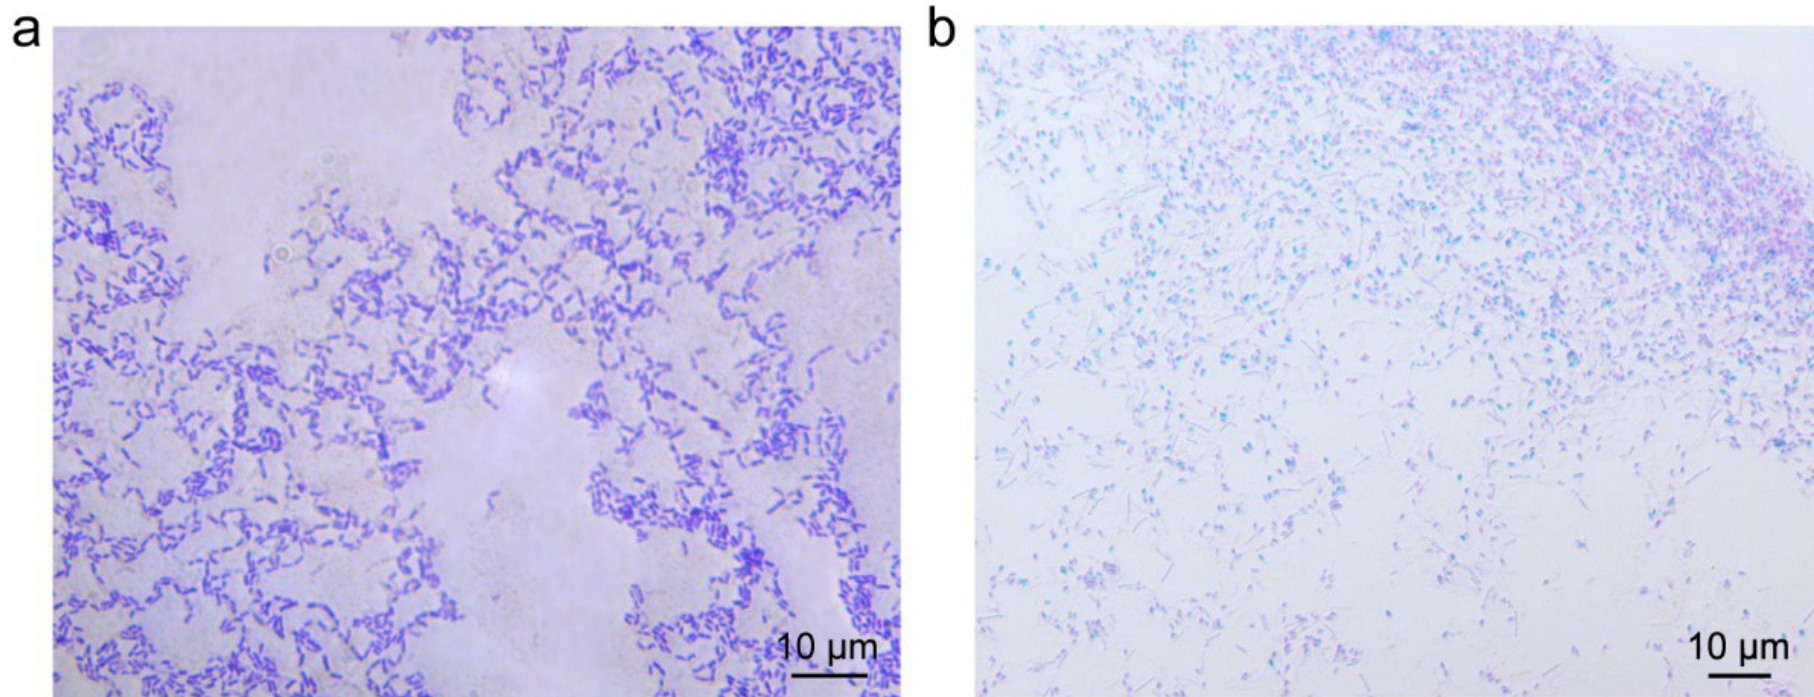

**Figure S3:** Network correlation of rhizosphere bacteria. Select the top 50 species with a total taxonomic level of abundance, and calculate correlation coefficients Pearson rank between species to reflect the correlation between species. the species with  $p \leq 0.05$  are shown, the size of the nodes indicates the species abundance, and different colors indicate different Phylum. Red line indicates positive correlation, and green indicates negative correlation; the thickness of the line indicates the size of the correlation coefficient, and the thicker the line, the higher the correlation between species. The more lines the species have, the closer other species.

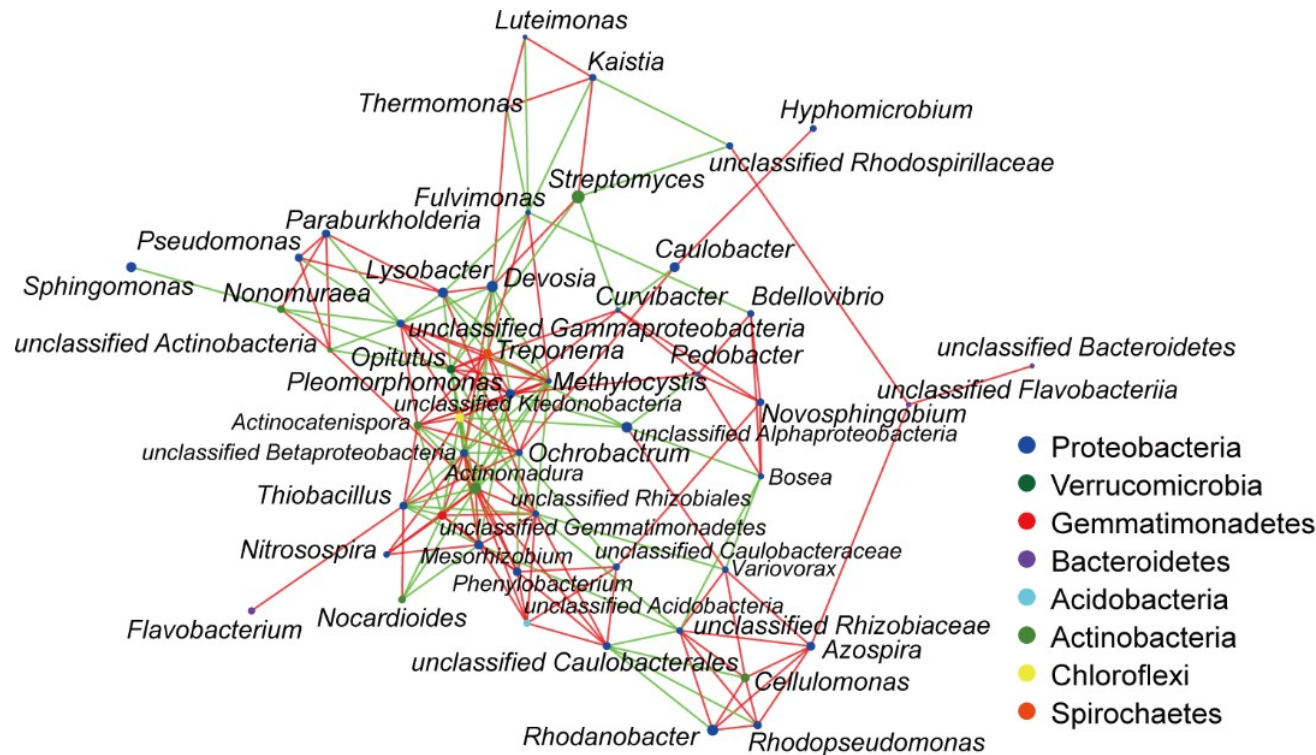

**Figure S4:** Species difference analysis based on LEfSe ([http://huttenhower.sph.harvard.edu/galaxy/root?tool\\_id=lefse\\_upload](http://huttenhower.sph.harvard.edu/galaxy/root?tool_id=lefse_upload)) at genus level. **(a)** the bacterial at rhizosphere, **(b)** in cotton roots. Linear discriminant analysis (LDA) was used to estimate the effect of the abundance of each component (species) on the difference effect. LDA threshold was 2, and Multi-group comparison strategy was all-against-all (more strict) that only species with differences in multiple groups can be considered as different species.

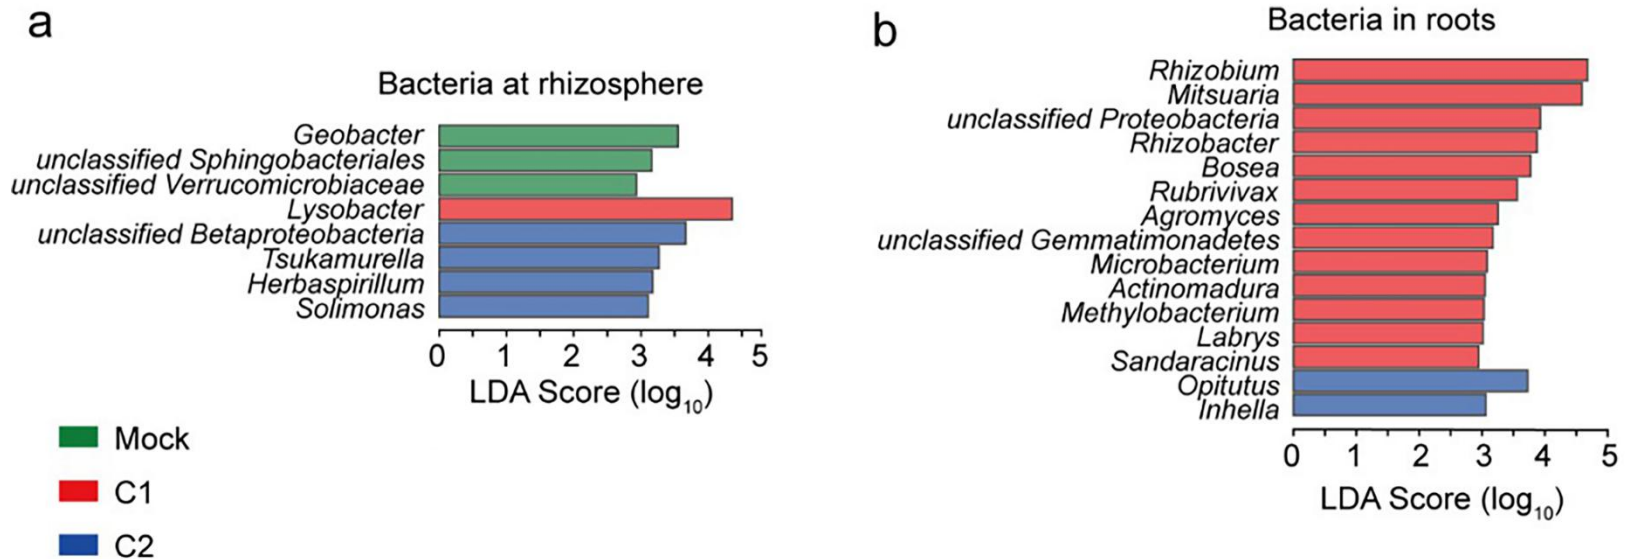

**Figure S5:** The changes of *Bacillus* species and Firmicutes in and around the cotton seedling roots. (A) *Bacillus* species at rhizosphere, (B) *Bacillus* species in cotton roots, (C) Firmicutes at rhizosphere, (D) Firmicutes in cotton roots.

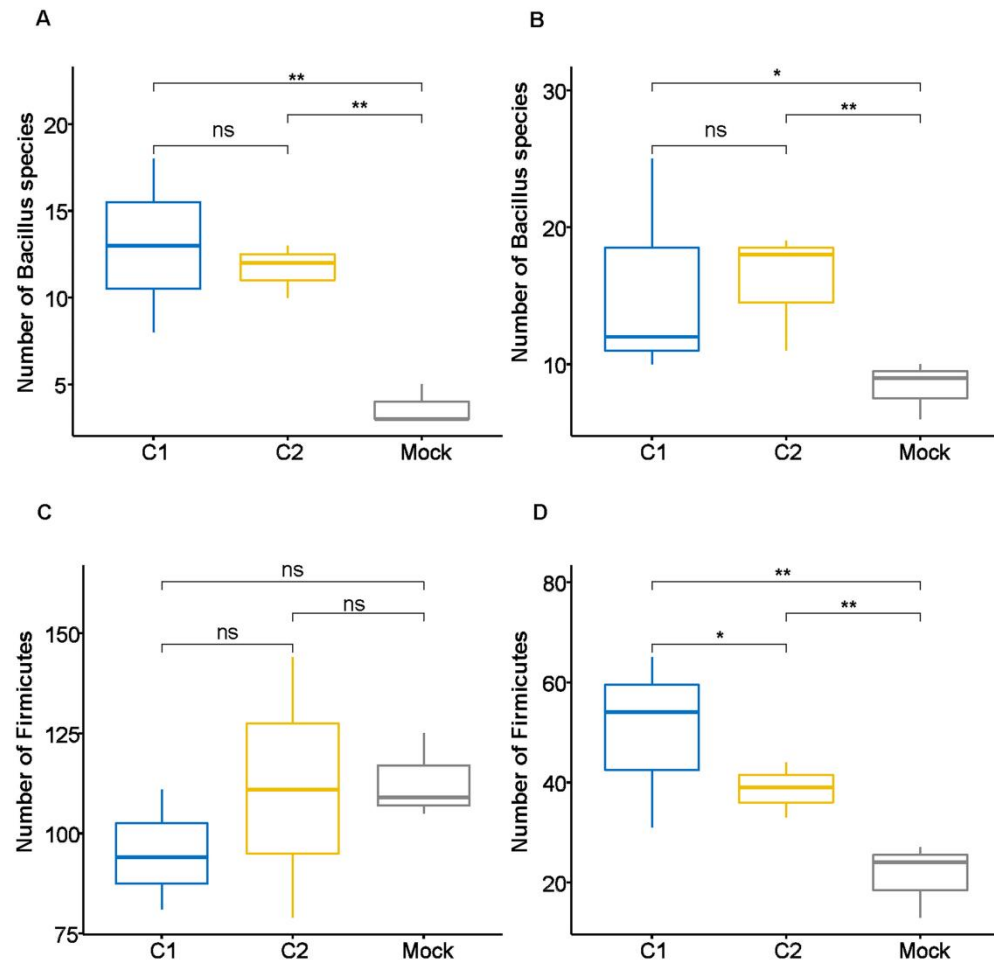

## Supplementary Tables

**Table S1:** Experimental design of cotton growth-promoting effected by inoculation GN03.

| Group | Method (1 mL/per plant)                          |
|-------|--------------------------------------------------|
| Mock  | Sterile water                                    |
| C1    | Inoculation $10^4$ bacterial cells/mL GN03 twice |
| C2    | Inoculation $10^8$ bacterial cells/mL GN03 twice |

**Table S2:** Primers for RT-qPCR

| Gene name       | Forward primer (5'--3')   | Reverse primer (5'-3')    | reference         |
|-----------------|---------------------------|---------------------------|-------------------|
| <i>Histone3</i> | GCCAAGCGTGTCACAATTATGC    | ACATCACATTGAACCTACCACTACC | Tu et al., 2007   |
| <i>AUX1</i>     | TTAACCCCTTCCATCCGCTTC     | TCTCCCACACGAAGTACAATG     | Yang et al., 2006 |
| <i>GA20ox</i>   | TTTACAAGAGCCGCTTGAC       | ACAAAGCCCAGCATTGTCC       | Yang et al., 2006 |
| <i>BR6ox1</i>   | GACAGGACCAAAGAGATGGCT     | TCTTGCCTGAAATCCTCGACG     | Yang et al., 2006 |
| <i>BES1</i>     | GGCTTGAGGCAATACGGTAATT    | AGGCGGCTAGCACATCGTT       | Yang et al., 2006 |
| <i>BRI1</i>     | CTTAAGACGCTTGATCTCAGCTACA | CGGCAAGGTTCCGATTGA        | Li et al., 2013   |
| <i>ICS1</i>     | ATGGATGAATGGGTGCGAAGG     | AAGAATGCCAGAGGTAAGAGGAGGA | Sun et al., 2014  |
| <i>EDS1</i>     | GCAGCAACAGCTCCTCTACCTCAA  | GGCAGACCAAGACGCTACAGATACA | Sun et al., 2014  |
| <i>AOC1</i>     | CTCCAAGCCCACAAAAGTT       | ACAGAGTCCAGCCGTGATGC      | Sun et al., 2014  |
| <i>AOC2</i>     | ATCTACTTCCACTCTTCCT       | GCCATTCCTTCTTCTTCTA       | Wang et al., 2015 |
| <i>TCP</i>      | CATCCGAACCCCAGATATGG      | TGTAAGGGTGCTTGCAATGTG     | Wang et al., 2015 |
| <i>NPR1</i>     | CTAGCTTGCGGAGGGATTGATACC  | GAGATGGCTGACCTGTCAAAGTGC  | Yan et al., 2016  |
| <i>PR1</i>      | AAGAATGTGGGTTAGTGAGAGGGT  | ACCACTTGAGTATAATGCCCGC    | Yan et al., 2016  |
| <i>PR5</i>      | AAGGAGTCCACCACAATCACCG    | CTGGCACTGCTATGGCTCGTAT    | Li et al., 2018   |
| <i>PDF1.2</i>   | CTGTGGTAGCGGATGGTGATAAG   | GTGCAGACGCATTTGCGAAGGAA   | Li et al., 2018   |



**References:**

- Li, X., et al., A cotton cyclin-dependent kinase e confers resistance to *Verticillium dahliae* mediated by jasmonate-responsive pathway. *Front Plant Sci*, 2018. **9**: p. 642.
- Li, Y., et al., A cotton gene encoding MYB-like transcription factor is specifically expressed in pollen and is involved in regulation of late anther/pollen development. *Plant Cell Physiol*, 2013. **54**(6): p. 893-906.
- Sun, L., et al., Cotton cytochrome P450 CYP82D regulates systemic cell death by modulating the octadecanoid pathway. *Nature Communications*, 2014. **5**(1): p. 5372.
- Tu, L., et al., Suitable internal control genes for qRT-PCR normalization in cotton fiber development and somatic embryogenesis. *Chin Sci Bull*, 2007. **52**(22): p. 3110-3117.
- Wang, L., et al., Comparative transcriptomics reveals jasmonic acid-associated metabolism related to cotton fiber initiation. *PloS one*, 2015. **10**(6): p. e0129854.
- Yan, Z., et al., Island cotton enhanced disease susceptibility 1 gene encoding a lipase-like protein plays a crucial role in response to *Verticillium dahliae* by regulating the SA level and H<sub>2</sub>O<sub>2</sub> accumulation. *Front Plant Sci*, 2016. **7**: p. 1830.
- Yang, S., et al., Accumulation of genome-specific transcripts, transcription factors and phytohormonal regulators during early stages of fiber cell development in allotetraploid cotton. *Plant J*, 2006. **47**(5): p. 761-75.

**Table S3:** General information of *B. circulans* GN03 and other four *B. circulans* strains. Parentheses indicated the number of comments in plasmid.

| <i>B. circulans</i> | Genome size | GC content | tRNA | 5S rRNA | 16S rRNA | 23S rRNA | plasmid | Transposon | GI     | Accession no.        | characteristic                                       |
|---------------------|-------------|------------|------|---------|----------|----------|---------|------------|--------|----------------------|------------------------------------------------------|
| GN03                | 5398834     | 35.50%     | 84   | 11      | 11       | 11       | 1       | 25 (3)     | 23 (1) | CP053315<br>CP053316 | Rhizobacteria; promote plant growth                  |
| PK3-138             | 5274417     | 35.67%     | 82   | 11      | 11       | 11       | 0       | 2          | 9      | CP026033             | Plant root endophytes; produce IAA                   |
| PK3-109             | 5175203     | 35.56%     | 82   | 11      | 11       | 11       | 0       | 2          | 11     | CP026031             | Plant root endophytes; increase fresh weigh of plant |
| RIT379              | 5454271     | 35.37%     | 85   | 10      | 1        | 11       | 0       | 14         | 17     | LDPH0000000          | internal stem tissue of the insulin plant            |
| NCTC2610            | 9629443     | 39.83%     | 154  | 17      | 18       | 18       | 0       | 20         | 21     | UAPZ0000000          |                                                      |



**Table S4:** Physiological and biochemical characteristics of GN03. All test strains were cultivated for 16 h at 37 °C. Note : “ + ”present positive reaction , “—”present negative reaction.

| Strain                       | GN03 |
|------------------------------|------|
| Catalase test                | +    |
| Oxidase test                 | —    |
| Starch hydrolysis test       | +    |
| D-glucose produced acid test | +    |
| D-xylose produced acid test  | +    |
| D-glucose produced gas test  | —    |
| methyl red test              | +    |
| Voges-Proskauer test         | +    |
| Citrate utilization test     | —    |
| Indole test                  | —    |
| gelatin liquefaction test    | +    |
| phenylalanine deaminase test | —    |
| nitrate reductase test       | +    |

**Table S5:** Alpha diversity for Shannon, Chao, Sob, and etc index for different test group and variance analysis between groups by Student's test in rhizosphere bacteria **(a)**, cotton roots bacteria **(b)**.

| Symbol | Estimators | Mock-Mean | Mock-Sd    | C1-Mean | C1-Sd     | C2-Mean | C2-Sd      | Pvalue (C1-C2) | Pvalue (Mock-C1) | Pvalue (Mock-C2) |
|--------|------------|-----------|------------|---------|-----------|---------|------------|----------------|------------------|------------------|
| (a)    | sobs       | 227.33    | 10.263     | 237.33  | 3.0551    | 241.67  | 14.572     | 0.6407         | 0.1811           | 0.2361           |
|        | shannon    | 4.1052    | 0.099157   | 4.1682  | 0.089615  | 4.1669  | 0.08276    | 0.9857         | 0.46             | 0.4548           |
|        | ace        | 252       | 18.968     | 263.76  | 6.3512    | 268.34  | 15.013     | 0.6517         | 0.3659           | 0.3068           |
|        | chao       | 250.15    | 20.266     | 265.46  | 11.143    | 271.75  | 5.9265     | 0.4362         | 0.3156           | 0.1511           |
|        | coverage   | 0.99578   | 0.00088695 | 0.99566 | 0.0004079 | 0.99555 | 0.00029246 | 0.7094         | 0.8466           | 0.6888           |
| (b)    | sobs       | 90        | 16.462     | 155     | 11.79     | 135.67  | 21.502     | 0.2438         | 0.005123         | 0.04321          |
|        | shannon    | 0.90966   | 0.39989    | 3.3392  | 0.37629   | 2.6654  | 0.79995    | 0.2573         | 0.001558         | 0.02727          |
|        | ace        | 152.32    | 18.438     | 201.94  | 4.0165    | 167.25  | 30.964     | 0.1266         | 0.01038          | 0.5128           |
|        | chao       | 121.09    | 11.228     | 199.67  | 4.3078    | 162.49  | 36.694     | 0.1562         | 0.0003473        | 0.135            |
|        | coverage   | 0.99092   | 0.0004119  | 0.98795 | 0.0007783 | 0.99065 | 0.0020601  | 0.1012         | 0.004296         | 0.8348           |
|        | sobs       | 2.3333    | 0.57735    | 3.6667  | 1.1547    | 3.3333  | 1.5275     | 0.778          | 0.1481           | 0.3486           |
